# Supplementary material for: Effect of Postdismissal Pharmacist Visits for Patients Using High-Risk Medications
Source: PubMed Central journal article supplement — Mayo Clin Proc Innov Qual Outcomes. 2018 Feb 1;2(1):4–9. doi: 10.1016/j.mayocpiqo.2017.12.004 (PMC6124340; doi:10.1016/j.mayocpiqo.2017.12.004), 2018-02-01
Supplement: mmc1.pdf [file mmc1.pdf]

**Appendix. List of High-Risk Medications**

| <b>Medication Class</b>        | <b>Generic</b> | <b>Brand(s)</b>    |
|--------------------------------|----------------|--------------------|
| Oral anticoagulants            | Warfarin       | Coumadin, Jantoven |
|                                | Dabigatran     | Pradaxa            |
|                                | Rivaroxaban    | Xarelto            |
|                                | Apixaban       | Eliquis            |
|                                | Edoxaban       | Savaysa            |
| Low-molecular-weight heparin   | Dalteparin     | Fragmin            |
|                                | Enoxaparin     | Lovenox            |
| Noninsulin hypoglycemic agents | Metformin      | Glucophage         |
|                                | Glimepiride    | Amaryl             |
|                                | Glipizide      | Glucotrol          |
|                                | Glyburide      | Glynase, Micronase |
|                                | Pioglitazone   | Actos              |
|                                | Rosiglitazone  | Avandia            |
|                                | Canagliflozin  | Invokana           |
|                                | Nateglinide    | Starlix            |
|                                | Repaglinide    | Prandin            |
|                                | Linagliptin    | Tradjenta          |
|                                | Sitagliptin    | Januvia            |
|                                | Saxagliptin    | Onglyza            |
|                                | Exenatide      | Byetta, Bydureon   |
| Liraglutide                    | Victoza        |                    |
| Acarbose                       | Precose        |                    |

|                |                     |                       |
|----------------|---------------------|-----------------------|
| Insulin        | Lispro              | Humalog               |
|                | Aspart              | NovoLog               |
|                | Glulisine           | Apidra                |
|                | Regular             | Humulin R, Novolin R  |
|                | Insulin NPH         | Humulin N, Novolin N  |
|                | Lispro protamine    | Humalog mix           |
|                | Aspart protamine    | NovoLog mix           |
|                | Glargine            | Lantus, Toujeo        |
|                | Detemir             | Levemir               |
|                | Antiplatelet agents | Aspirin $\geq 325$ mg |
| Prasugrel      |                     | Effient               |
| Ticagrelor     |                     | Brilinta              |
| Clopidogrel    |                     | Plavix                |
| Loop diuretics | Bumetanide          | Bumex                 |
|                | Furosemide          | Lasix                 |
|                | Torsemide           | Demadex               |

---
